# Supplementary material for: Chemical pressure engineering of perovskite oxide nanoparticles for oxygen evolution
Source: Research Square preprint supplement (doi:10.21203/rs.3.rs-8431296/v1), 2025-12-30
Supplement: Supplementary file 1 [file 824069523da6d3793b291810.docx]

**Chemical pressure engineering of perovskite oxide nanoparticles for oxygen evolution**

Sandeep Kumar1, Sesh Mani Yadav1, Prashant shahi1, Shubhankar Majumdar2, Prabir Kumar Saha2, Sk Abdul Moyez3*,Ankur Soam4*, Manindra Kumar1*, Deepash Shekhar Saini1*

1Department of Physics, Deen Dayal Upadhyaya Gorakhpur University, Gorakhpur, India-273009

2Department of Electronics and Communication Engineering, NIT Meghalaya, Meghalaya, India-793108

3Department of Chemical Engineering, University of Calcutta, 92 A. P. C. Road, Kolkata, India - 700009

4Department of Physics, School of Physical and Biological Sciences, Faculty of Science, Technology and Architecture, Manipal University Jaipur, Jaipur, India-303007

*Corresponding Author:

Deepash Shekhar Saini: [deepash.phy@ddugu.ac.in](mailto:deepash.phy@ddugu.ac.in), [dssainiddugu@gmail.com](mailto:dssainiddugu@gmail.com)

Manindra Kumar: [manindra.phy@ddugu.ac.in](mailto:manindra.phy@ddugu.ac.in)

Ankur Soam: [ankur.soam@jaipur.manipal.edu](mailto:ankur.soam@jaipur.manipal.edu), [ankursoam007@gmail.com](mailto:ankursoam007@gmail.com)

Sk Abdul Moyez: [ab.moyez@gmail.com](mailto:ab.moyez@gmail.com)

**Supporting Information**

**
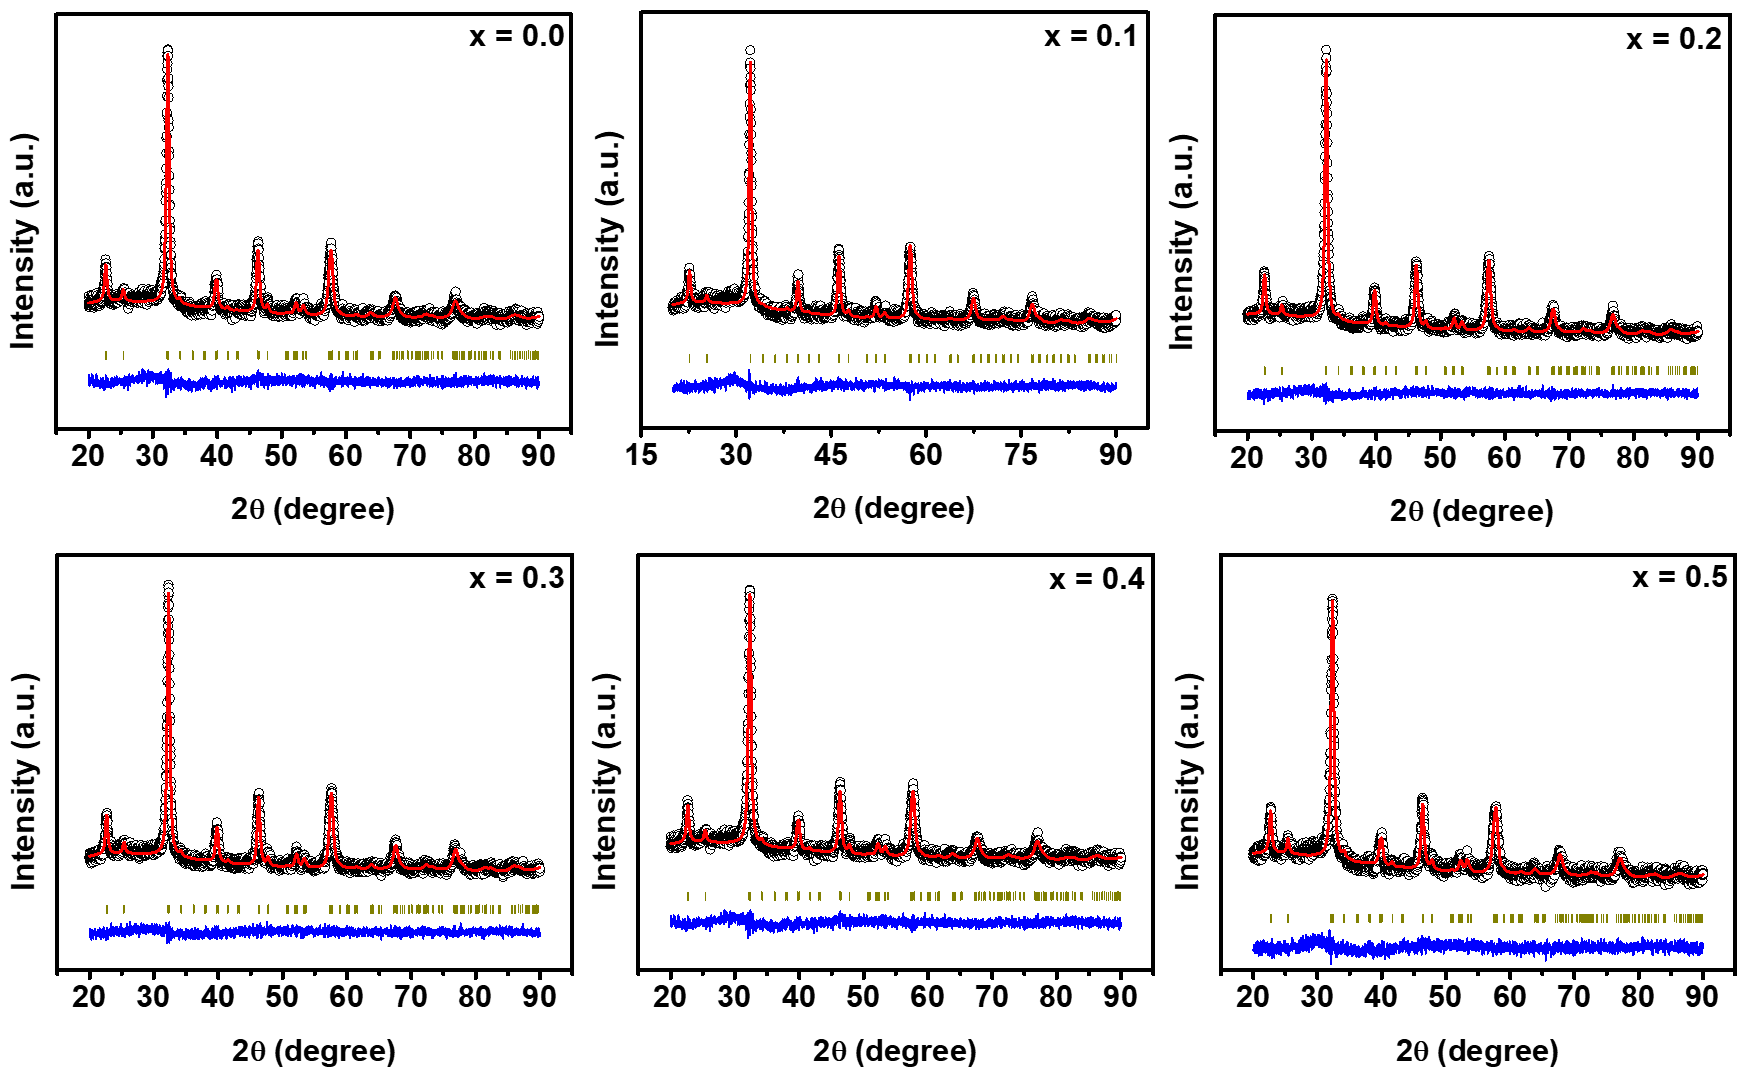
**

**Fig. S1** The Rietveld refinement of the XRD patterns of the La1-xNdxFeO3 (0 ≤ x ≤ 0.5, Δ = 0.1) nanoparticles.

**Table S1.** Structural and refinement parameters of orthorhombic La1-xNdxFeO3 (x = 0.0, 0.1, 0.2, 0.3, 0.4, and 0.5) nanoparticles.

| **La1-xNdxFeO3** | **Lattice parameter (Å)** | **Unit cell volume (Å3)** | **Density (g/cm3)** | **Crystallite size (nm)** | **Micro strain** | **Refinement parameter** |
| --- | --- | --- | --- | --- | --- | --- |
| **x = 0.0** | a = 5.5635,  b = 7.8614,  c = 5.5608 | 243.2097 | 6.6296 | 54.8547 | 21.59 | Rwp = 5.291, Rp = 4.151, Re = 5.049, GofF = 1.0979 |
| **x = 0.1** | a = 5.5625,  b = 7.8503,  c = 5.5500 | 242.3528 | 6.6676 | 46.11987 | 24.4 | Rwp = 5.571, Rp = 4.382, Re = 5.316, GofF = 1.0979 |
| **x = 0.2** | a = 5.5606,  b = 7.8522,  c = 5.5522 | 242.4246 | 6.6803 | 216.5317 | 15.68 | Rwp = 5.391, Rp = 4.251, Re = 5.276, GofF = 1.0442 |
| **x = 0.3** | a = 5.5630,  b = 7.8436,  c = 5.5387 | 241.6786 | 6.7156 | 38.61771 | 25.45 | Rwp = 5.289, Rp = 4.187, Re = 5.123, GofF = 1.0658 |
| **x = 0.4** | a = 5.5659,  b = 7.8320,  c = 5.5288 | 241.0113 | 6.7489 | 26.14014 | 28.24 | Rwp = 5.205, Rp = 4.152, Re = 5.036, GofF = 1.0682 |
| **x = 0.5** | a = 5.5650,  b = 7.8281,  c = 5.5204 | 240.4850 | 6.7784 | 32.98779 | 26.93 | Rwp = 5.032, Rp = 4.009, Re = 4.967, GofF = 1.0263 |

**Table S2.** Bond lengths and bond angles of orthorhombic La1-xNdxFeO3 (x = 0.0, 0.1, 0.2, 0.3, 0.4, and 0.5) nanoparticles.

| **x** | **Bond length (Å)** | | | | **Bond angle (°)** | | | | |
| --- | --- | --- | --- | --- | --- | --- | --- | --- | --- |
| **Fe-O1** | **Fe-O2** | **La/Nd-O1** | **La/Nd-O2** | **Fe-O1-Fe** | **Fe-O2-Fe** | **Fe-O1-La/Nd** | **Fe-O2-La/Nd** | **La/Nd-O2-La/Nd** |
| **0.0** | 2.0067(8) | 2.0057(8) | 2.4251(13) | 2.6526(8) | 155.964(16) | 156.479(8) | 101.455(8) | 87.87(4) | 98.96(4) |
| **0.1** | 1.984(3) | 2.0882(13) | 2.512(3) | 2.5050(14) | 163.78(3) | 148.81(4) | 97.639(12) | 90.04(6) | 106.72(7) |
| **0.2** | 1.9806(8) | 1.9494(5) | 3.0551(10) | 2.5488(6) | 163.376(8) | 154.541(9) | 83.351(4) | 92.15(3) | 101.68(3) |
| **0.3** | 2.0117(8) | 1.9287(5) | 3.2069(10) | 2.5163(6) | 153.647(12) | 155.446(10) | 77.985(6) | 93.32(3) | 102.52(3) |
| **0.4** | 2.0146(5) | 1.8367(4) | 3.2493(9) | 2.5152(4) | 152.002(9) | 156.111(7) | 77.329(5) | 95.519(18) | 101.479(19) |
| **0.5** | 2.0145(5) | 1.8848(4) | 3.2588(9) | 2.5437(4) | 151.736(10) | 155.332(6) | 76.919(5) | 92.770(18) | 101.253(19) |


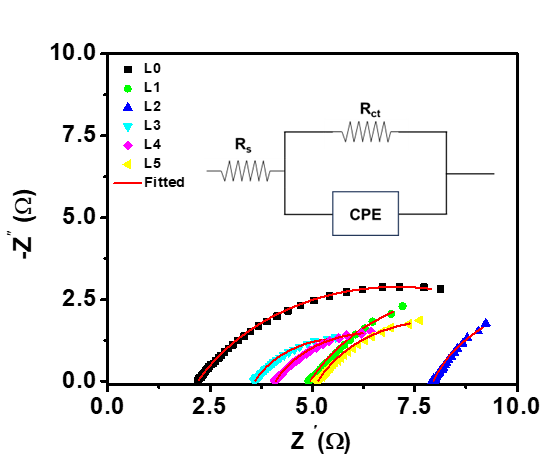


**Fig. S2.** Nyquist plot derived from electrochemical impedance spectra for Sample L0, L1, L2, L3, L4, and L5.

**Table S3.** The electrical equivalent circuit fitting parameters from the Nyquist plot.

| Sample | Rs (Ω) | Q | n | Rct (Ω) |
| --- | --- | --- | --- | --- |
| L0 | 2.201 | 0.02003 | 0.681 | 9.754 |
| L1 | 4.945 | 0.06581 | 0.7044 | 8.919 |
| L2 | 7.953 | 0.08723 | 0.7757 | 6.894 |
| L3 | 3.595 | 0.0696 | 0.7075 | 4.227 |
| L4 | 4.096 | 0.05882 | 0.7036 | 4.815 |
| L5 | 5.133 | 0.05704 | 0.7094 | 5.917 |


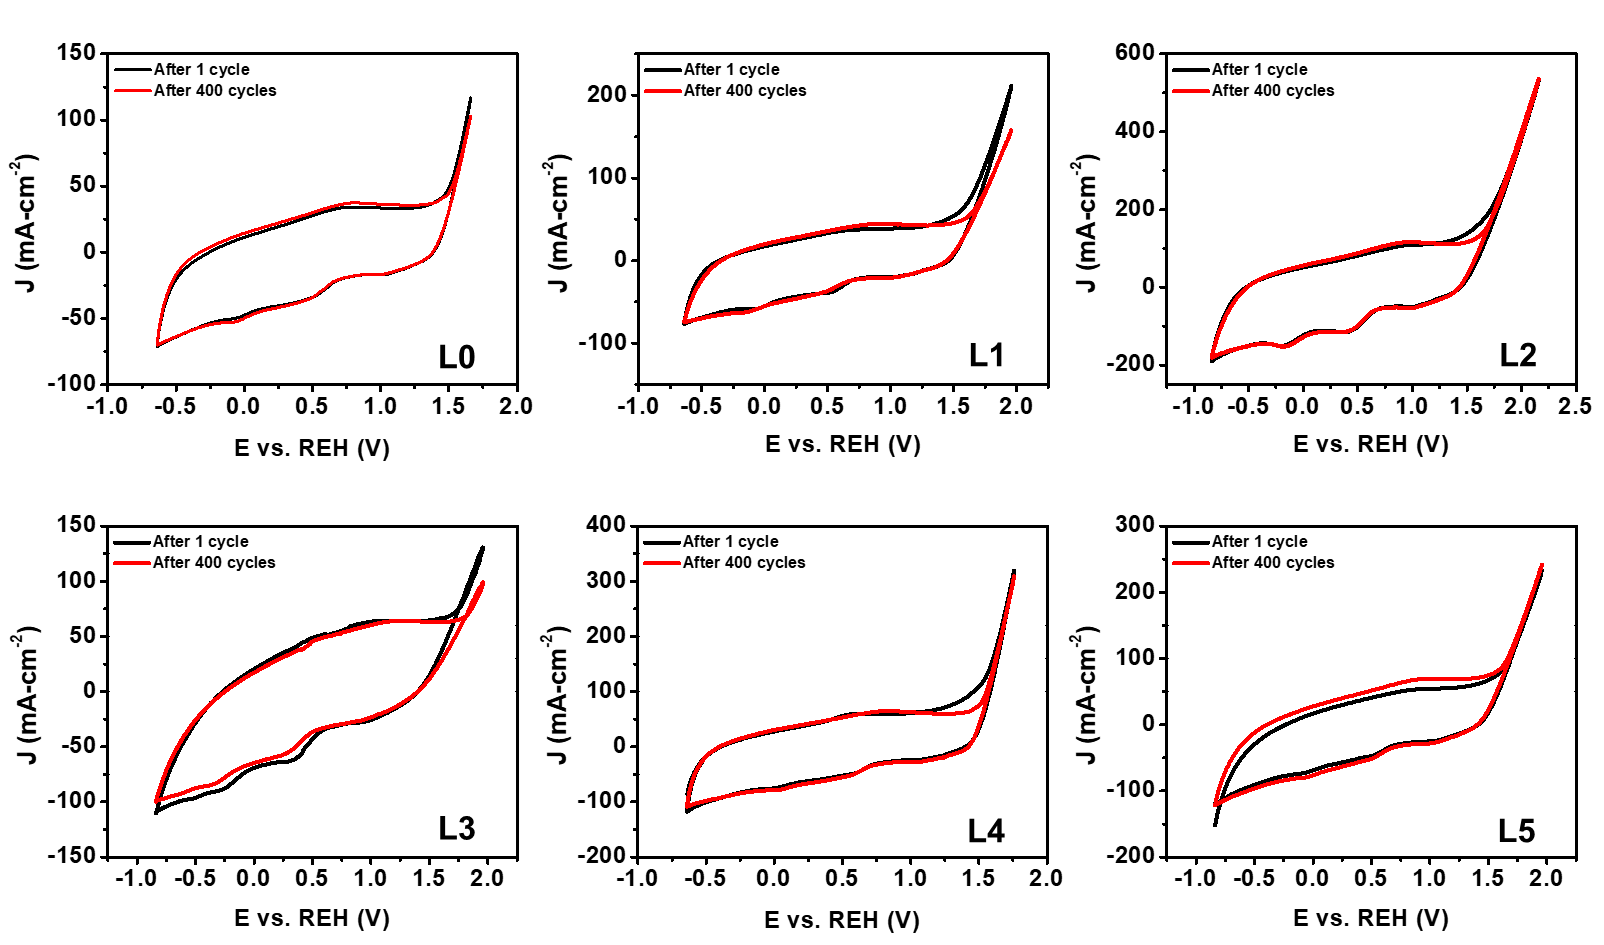


**Fig. S3.** Selected CV curves of the L0, L1, L2, L3, L4, and L5 samples over 400 cycles in 2M KOH electrolyte at a 1 mV s-1 scan rate.

**Fig. S4.** The pH-dependent OER kinetic currents in 2M KOH electrolyte at a 1mV s-1 scan rate.


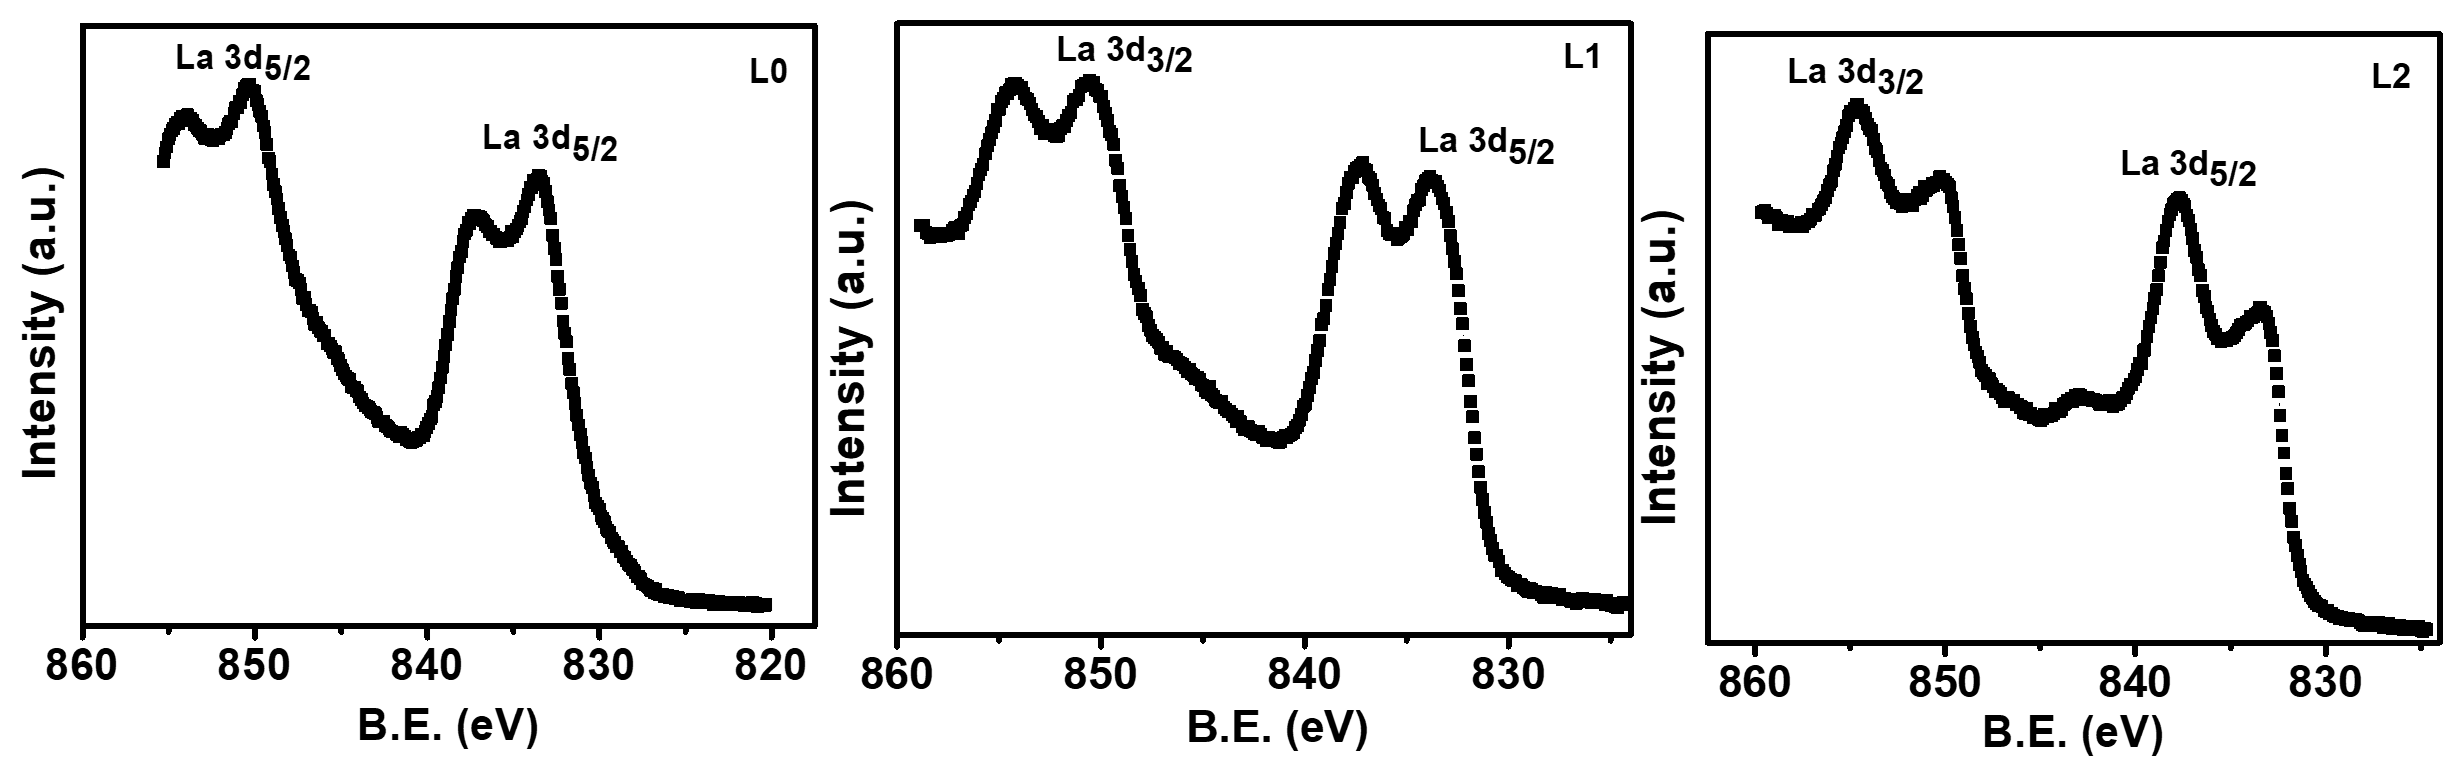

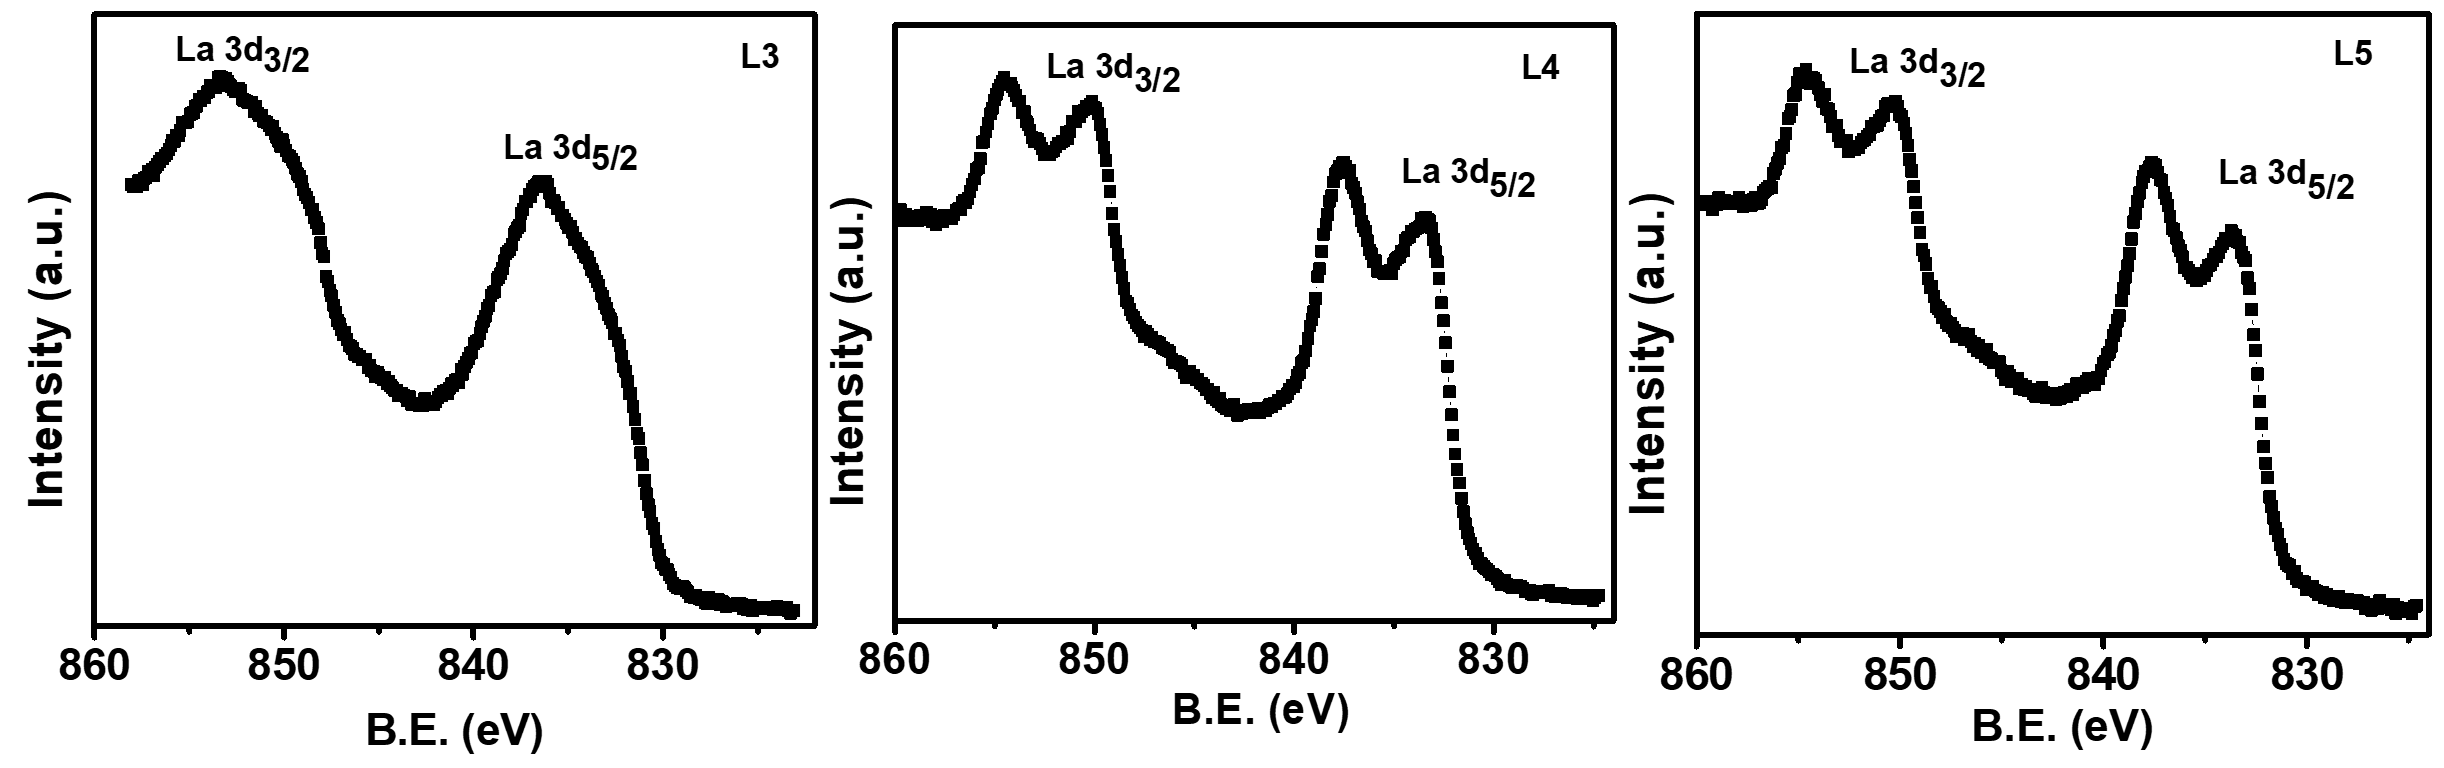


**Fig. S5.** XPS spectra of La 3d for (a) L0 (b) L1 (c) L2 (d) L3 (e) L4 and (f) L5 catalysts


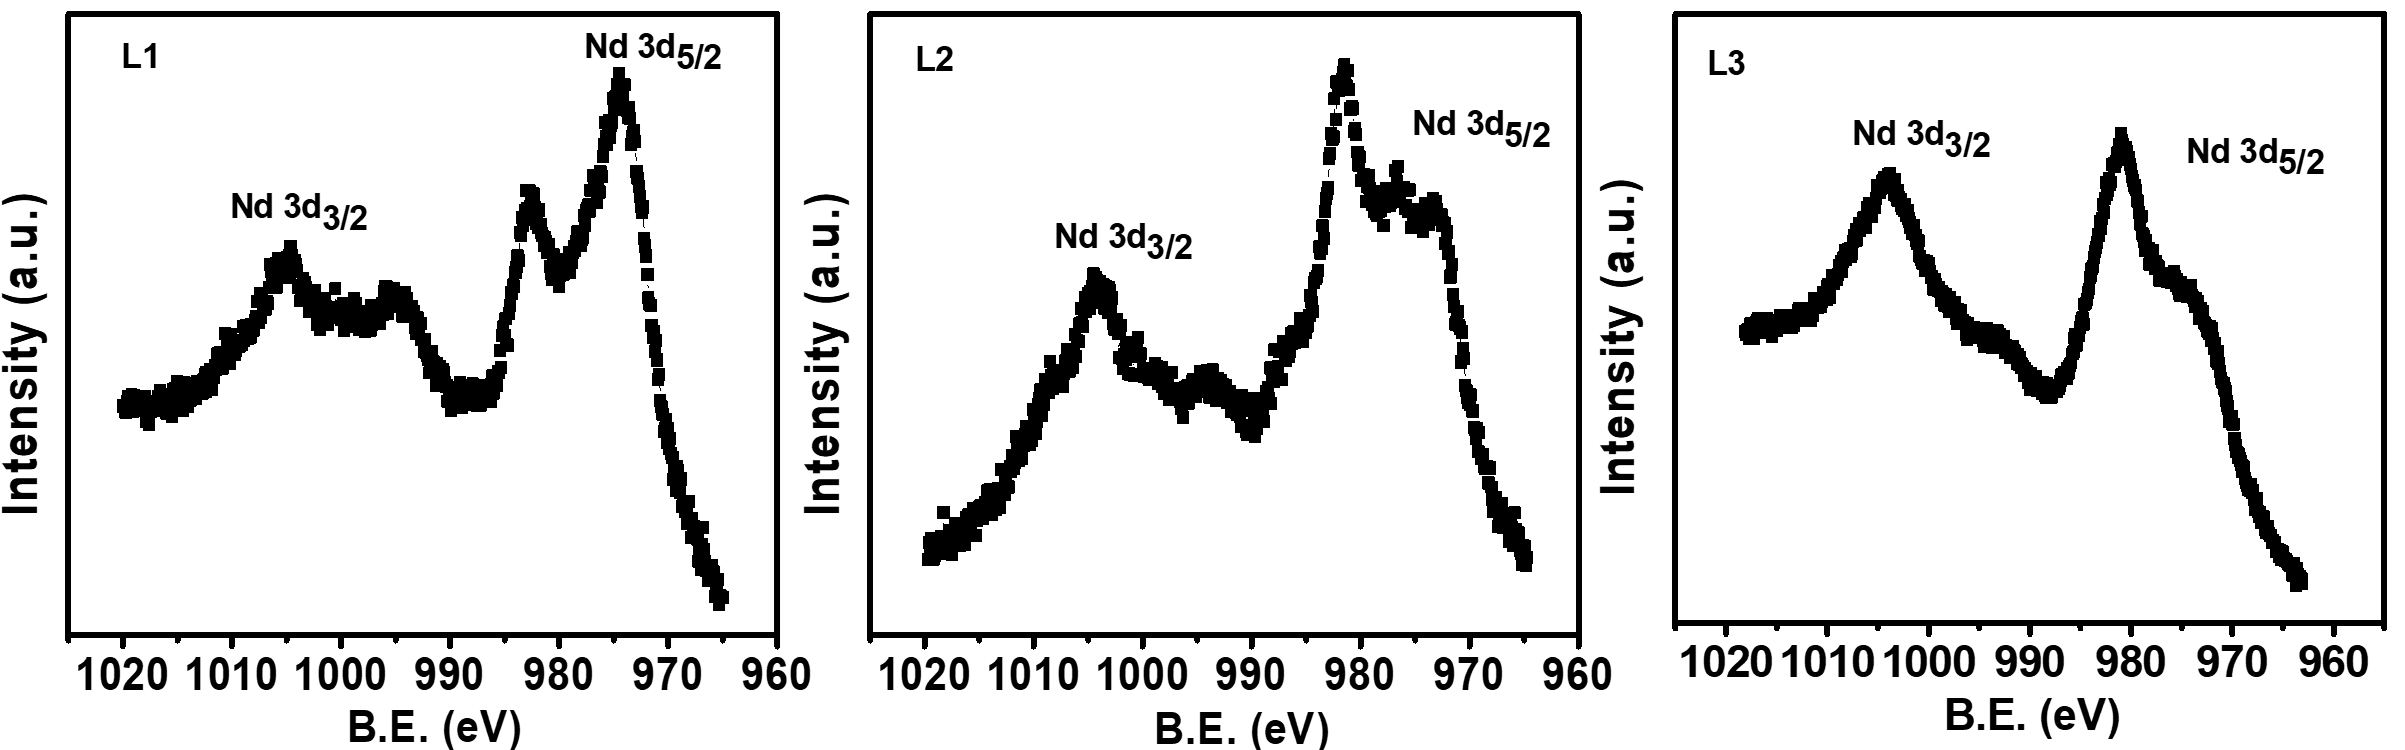

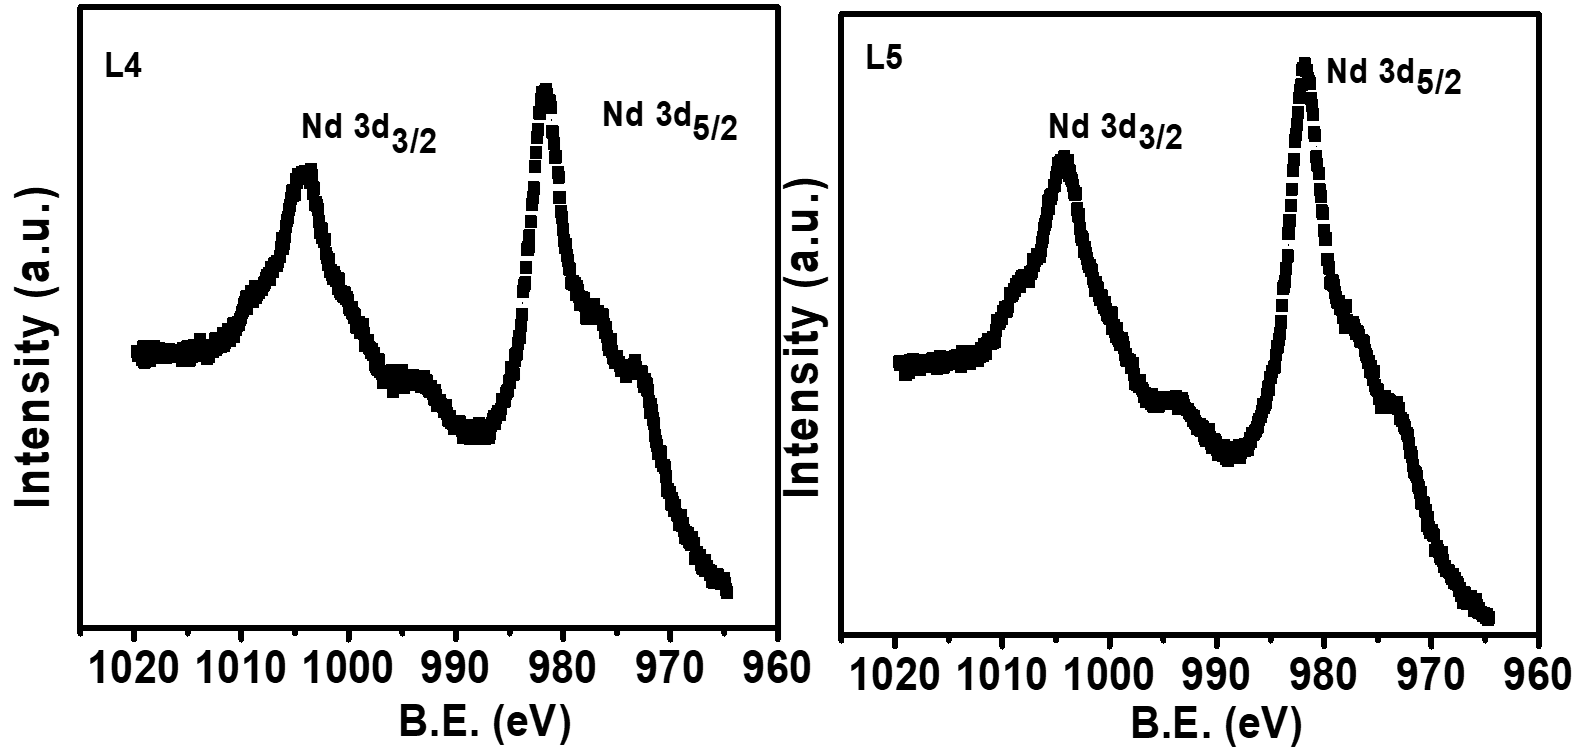


**Fig. S6.** XPS spectra of Nd 3d for (a) L0 (b) L1 (c) L2 (d) L3 (e) L4 and (f) L5 catalysts


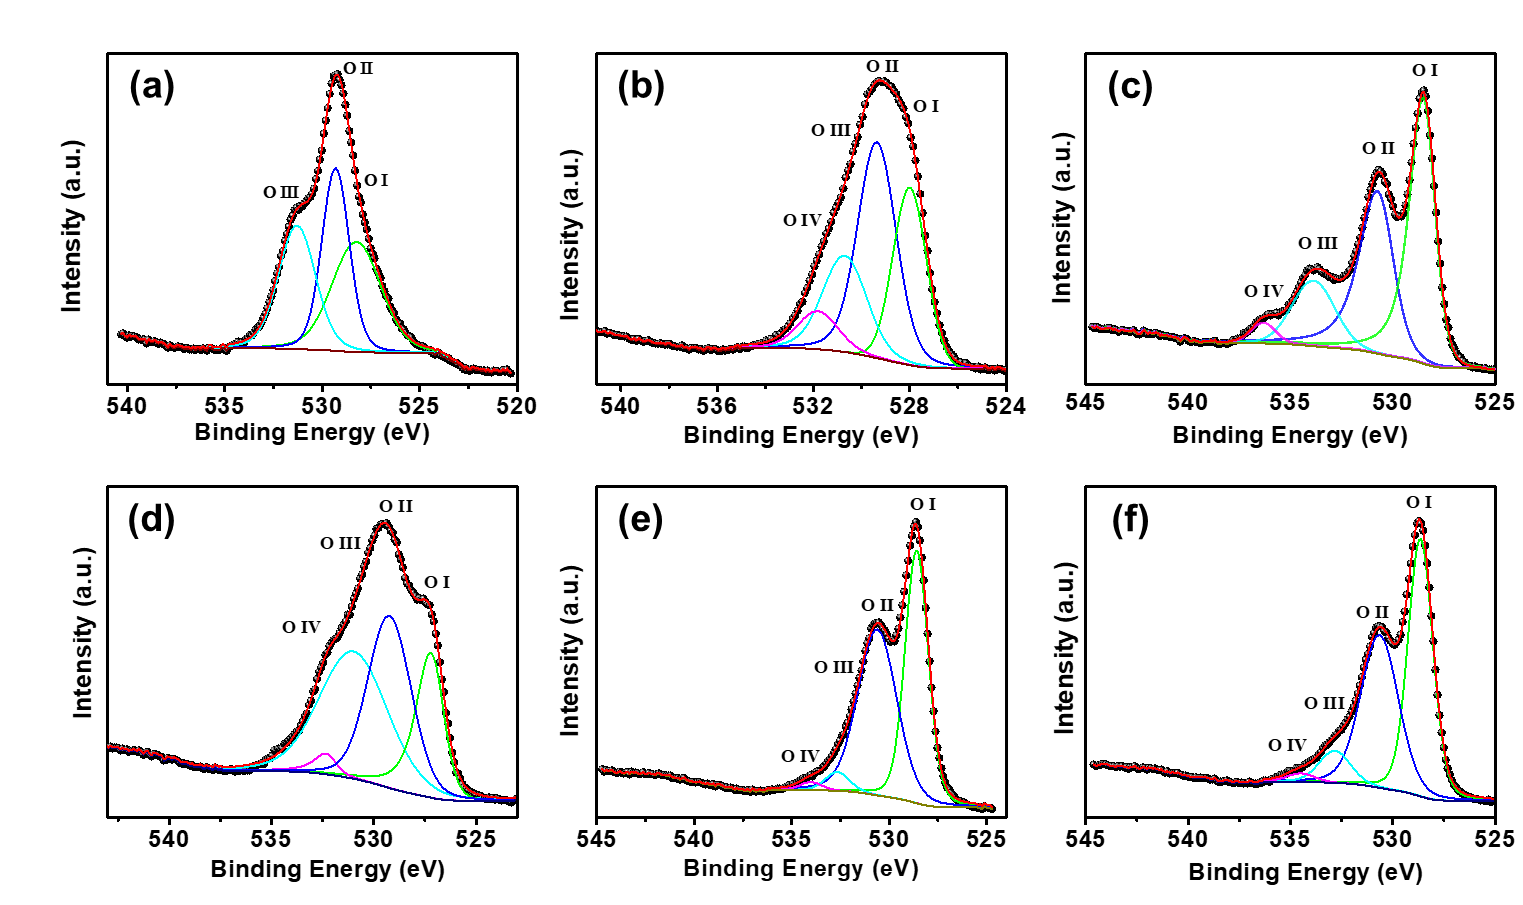


**Fig.S7.** XPS spectra of O1 s for (a) L0 (b) L1 (c) L2 (d) L3 (e) L4 and (f) L5 catalysts with peak fitting results based on multiple oxygen species.

**Table S4.** Deconvoluted value of O1s of L0, L1, L2, L3, L4 and L5 catalyst

| Sample | Position (eV) | | | | Area | | | | Area (%) | | | |
| --- | --- | --- | --- | --- | --- | --- | --- | --- | --- | --- | --- | --- |
| OI (O2-) | OII  (O-,O22-) | OIII  (OH-, CO32-) | OIV  (H2O) | OI | OII | OIII | OIV | OI | OII | OIII | OIV |
| L0 | 528.24 | 529.31 | 531.29 |  | 113470.68 | 105540.30 | 96707.26 |  | 35.95 | 33.43 | 30.63 |  |
| L1 | 528 | 529.37 | 530.70 | 531.82 | 118025.55 | 179256.69 | 91073.49 | 33152.68 | 28 | 42.53 | 21.63 | 7.8 |
| L2 | 528.42 | 530.63 | 533.84 | 536.29 | 204216.49 | 165597.62 | 71788.65 | 12333.96 | 44.99 | 36.48 | 5.8 | 2.72 |
| L3 | 527.14 | 529.23 | 530.99 | 532.16 | 72867.15 | 63674.04 | 166462.66 | 1600515.81 | 20.54 | 34.98 | 41.64 | 2.83 |
| L4 | 528.57 | 530.50 | 532.65 | 534.02 | 199905.02 | 219809.69 | 15514.29 | 6072.09 | 45.30 | 49.81 | 3.52 | 1.38 |
| L5 | 528.64 | 530.64 | 532.83 | 534.50 | 232837.99 | 209337.04 | 36666.79 | 8523.73 | 47.77 | 42.45 | 7.52 | 1.75 |


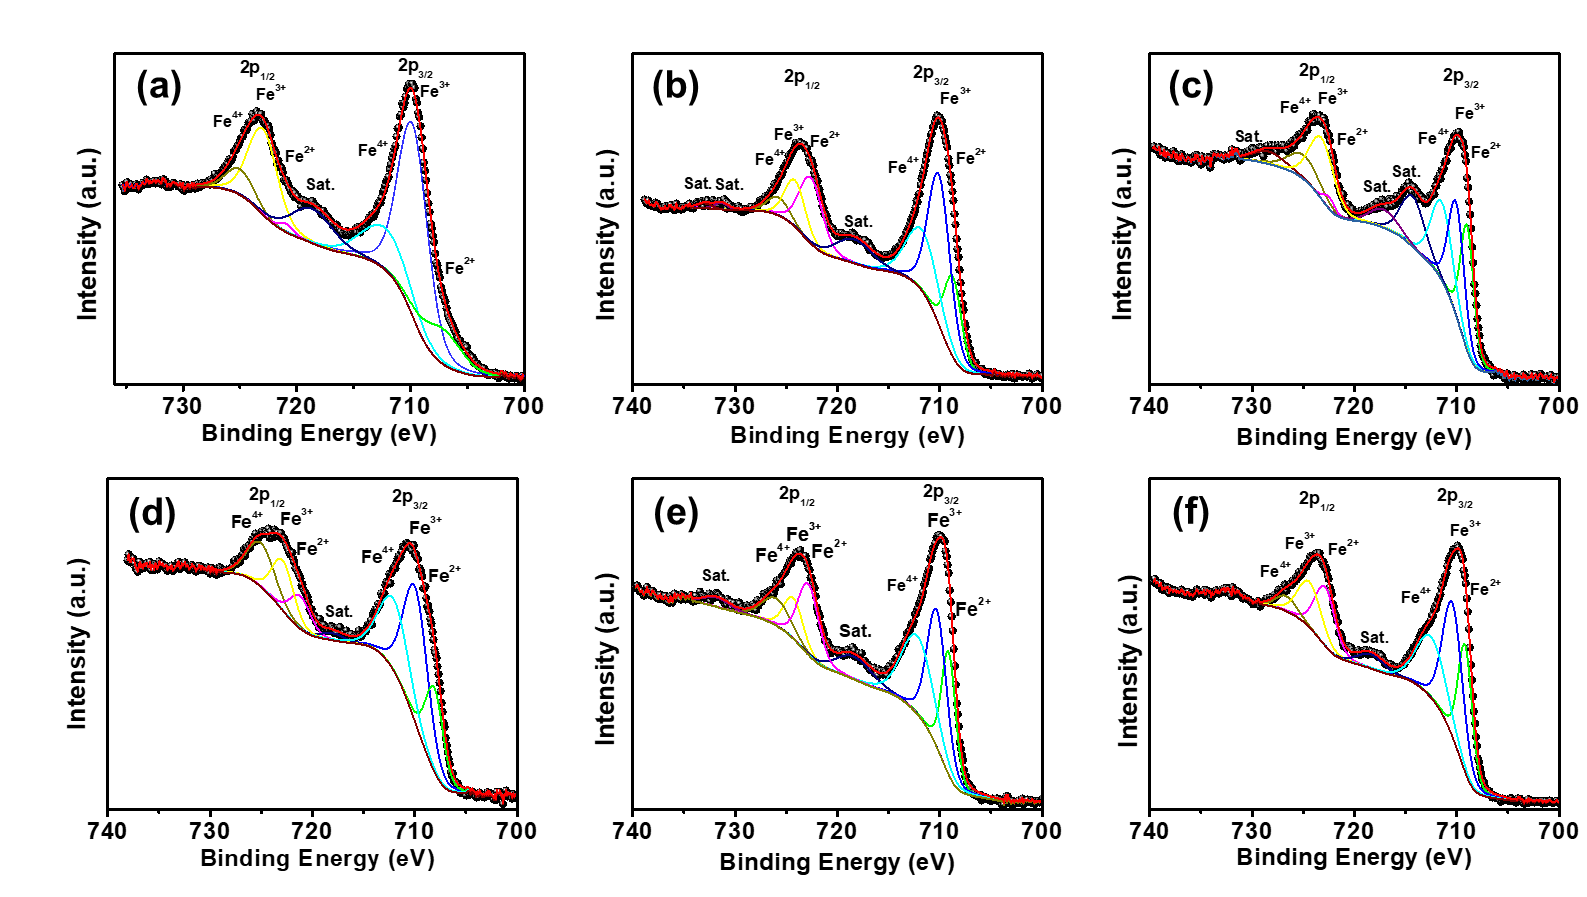


**Fig. S8.** Fe 2p core level XPS spectra of La1-xNdxFeO3 nanoparticles for (a) L0 (b) L1 (c) L2 (d) L3 (e) L4 and (f) L5 catalysts with peak fitting results based on multiple iron species. Here, Sat. represents satellite peaks.

**Table S5.** Deconvoluted value of Fe 2p spectra of L0, L1, L2, L3, L4, and L5 catalysts

| Sample | 2p3/2 | | | 2p1/2 | | |
| --- | --- | --- | --- | --- | --- | --- |
| Fe2+ % | Fe3+ % | Fe4+ % | Fe2+ % | Fe3+ % | Fe4+ % |
| L0 | 9.80 | 41.29 | 14.38 | 0.88 | 18.06 | 5.20 |
| L1 | 13.04 | 31.49 | 18.20 | 14.58 | 9.05 | 3.80 |
| L2 | 17.31 | 18.55 | 17.44 | 1.44 | 15.68 | 7.78 |
| L3 | 15.08 | 32.71 | 20.82 | 6.86 | 10.77 | 12.09 |
| L4 | 15.70 | 24.19 | 22.48 | 5.42 | 10.66 | 9.66 |
| L5 | 19.63 | 28.87 | 19.25 | 13.18 | 11.59 | 3.39 |


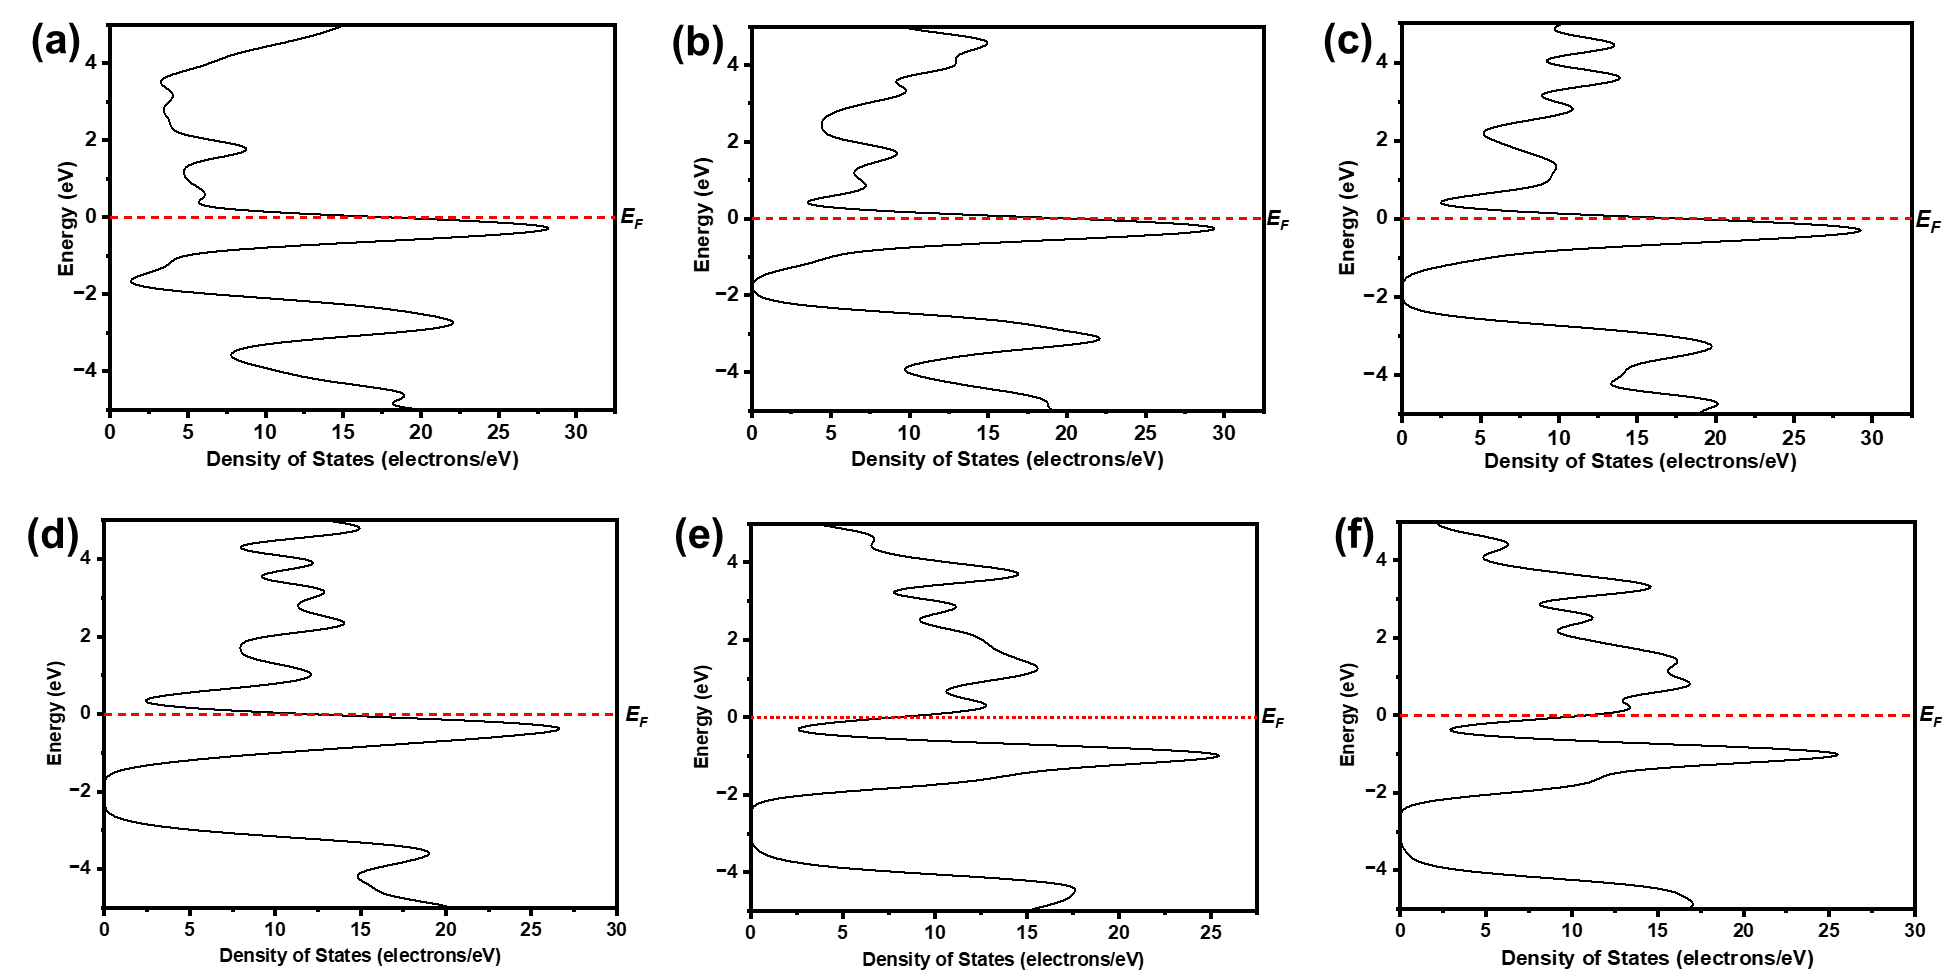


**Fig. S9.** The total density of states (TDOS) of orthorhombic La1-xNdxFeO3 (a) L0, (b) L1, (c) L2, (d) L3, (e) L4, and (f) L5 nanoparticles.

**Table S6.** Comparison of the catalytic performance of perovskite-based nanoparticles. Here, stands for overpotential at a current density of 10 mA cm-2.

| S.No. | Catalyst | electrolyte |  | References |
| --- | --- | --- | --- | --- |
| 1. | La0.25Sr0.75Co0.5Fe0.5O3-δ | 0.1M KOH | 324 mV | 1 |
| 2. | La0.5Sr1.5Ni0.7Fe0.4O4±δ | 0.1 M KOH | 360 mV | 2 |
| 3. | La0.9Ce0.1NiO3 | 1 M KOH | 270 mV | 3 |
| 4. | LaNi1-xFexO3 | 1 M KOH | 350 mV | 4 |
| 5. | La1−xSrxFeO3−δ | 0.1 M KOH | 370 mV | 5 |
| 6. | La0.2Sr0.8FeO3 | 1 M KOH | 339.2 mV | 6 |
| 7. | SrCo1–ySiyO3–δ | 0.1 M KOH | 417 mV | 7 |
| 8. | LaNiO3 | 0.1 M KOH | 400 mV | 8 |
| 9. | La1-xSrxCoO3-δ | 0.1 M KOH | 220 mV | 9 |
| 10 | LaFeO3 | 2 M KOH | 226 mV | Present work |
| 11. | La0.90Nd0.10FeO3 | 2 M KOH | 222 mV | Present work |
| 12. | La0.80Nd0.20FeO3 | 2 M KOH | 202 mV | Present work |
| 13. | La0.70Nd0.30FeO3 | 2 M KOH | 196 mV | Present work |
| 14. | La0.60Nd0.40FeO3 | 2 M KOH | 179 mV | Present work |
| 15. | La0.50Nd0.50FeO3 | 2 M KOH | 190 mV | Present work |

**References**

1. Zhu, Y. *et al.* Self-Assembled Ruddlesden–Popper/Perovskite Hybrid with Lattice-Oxygen Activation as a Superior Oxygen Evolution Electrocatalyst. *Small* **16**, (2020).

2. Forslund, R. P. *et al.* Exceptional electrocatalytic oxygen evolution via tunable charge transfer interactions in La0.5Sr1.5Ni1−xFexO4±δ Ruddlesden-Popper oxides. *Nat Commun* **9**, (2018).

3. Sun, Y. *et al.* A-Site Management Prompts the Dynamic Reconstructed Active Phase of Perovskite Oxide OER Catalysts. *Adv Energy Mater* **11**, (2021).

4. Cheraparambil, H., Vega-Paredes, M., Scheu, C. & Weidenthaler, C. Unraveling the Evolution of Dynamic Active Sites of LaNixFe1-xO3 Catalysts During OER. *ACS Appl Mater Interfaces* **16**, 21997–22006 (2024).

5. She, S. *et al.* Systematic Study of Oxygen Evolution Activity and Stability on La1- xSrxFeO3-δ Perovskite Electrocatalysts in Alkaline Media. *ACS Appl Mater Interfaces* **10**, 11715–11721 (2018).

6. Fang, G. *et al.* Unveiling the electron configuration‐dependent oxygen evolution activity of 2D porous Sr‐substituted LaFeO 3 perovskite through microwave shock. *Carbon Neutralization* **2**, 709–720 (2023).

7. Pan, Y. *et al.* Direct evidence of boosted oxygen evolution over perovskite by enhanced lattice oxygen participation. *Nat Commun* **11**, (2020).

8. Petrie, J. R. *et al.* Enhanced Bifunctional Oxygen Catalysis in Strained LaNiO3 Perovskites. *J Am Chem Soc* **138**, 2488–2491 (2016).

9. Mefford, J. T. *et al.* Water electrolysis on La1-xSrxCoO3-δ perovskite electrocatalysts. *Nat Commun* **7**, (2016).
